# Supplementary material for: GNAQ and GNA11 Genes: A Comprehensive Review on Oncogenesis, Prognosis and Therapeutic Opportunities in Uveal Melanoma
Source: MDPI journal article supplement (doi:10.3390/cancers14133066), 2022-06-22
Supplement: s1 [file s1]

Table S1. UM-targeted therapies against *GNAQ* and *GNA11* in preclinical studies and their outcomes.

| Drug                                              | Target Mechanisms | UM Sample Types                                                                                                           | Validation Methods       | Anti-tumor Actions                                                                                                                              | References                                |
|---------------------------------------------------|-------------------|---------------------------------------------------------------------------------------------------------------------------|--------------------------|-------------------------------------------------------------------------------------------------------------------------------------------------|-------------------------------------------|
| AEB071<br>(Sotrastaurin)                          | PKC               | UM cell lines (C918, Mel202, Mel270, Mel285, Mel290, MUM-2C, OCM-1, OCM-3, OMM-GN11, OMM1.3, UPMD1, and 92.1) and UM PDXs | AA, ATM, PA, PCR, and WB | Promotes apoptosis, and G1 cell cycle arrest<br>Inhibits tumor growth, and NF-κB activity                                                       | (Chen et al., 2014; Wu, Li, et al., 2012) |
| AEB071<br>(Sotrastaurin) + BYL719<br>(Alpelisib)  | PKC + PI3Kα       | UM cell lines (C918, Mel202, Mel270, Mel290, OMM1, OMM1.3, and 92.1) and UM PDXs                                          | AA, ATM, VA, and WB      | Synergistic effect between Sotrastaurin + Alpelisib relative to monotherapies<br>(Increase apoptosis, and inhibit and tumor growth)             | (Musi et al., 2014)                       |
| AEB071<br>(Sotrastaurin) + CGM097                 | PKC + MDM2        | UM cell lines (Mel202, Mel285, Mel290, MM28, MM33, MM66, MP38, MP41, MP42, MP65, OMM1, OMM2.5, and 92.1) and UM PDXs      | AA, ATM, PA, and WB      | Additive effect between Sotrastaurin + CGM097 relative to monotherapies<br>(Increase apoptosis, inhibit proliferation, and tumor growth)        | (Carita et al., 2016)                     |
| AEB071<br>(Sotrastaurin) + RAD001<br>(Everolimus) | PKC + mTOR        |                                                                                                                           |                          | Synergistic effect between Sotrastaurin + Everolimus relative to monotherapies<br>(Increase apoptosis, inhibit proliferation, and tumor growth) |                                           |

|                                                       |           |                                                                                                                                                                                                      |                        |                                                                                                                                                    |                                                |
|-------------------------------------------------------|-----------|------------------------------------------------------------------------------------------------------------------------------------------------------------------------------------------------------|------------------------|----------------------------------------------------------------------------------------------------------------------------------------------------|------------------------------------------------|
| <hr/>                                                 |           |                                                                                                                                                                                                      |                        |                                                                                                                                                    |                                                |
| AEB071<br>(Sotrastaurin)<br>+ MEK162<br>(Binimetinib) | PKC + MEK | UM cell lines (C918,<br>Mel202, Mel270,<br>Mel285, Mel290,<br>MM28, MM33,<br>MM66, MP38,<br>MP41, MP42,<br>MP65, MUM-2C,<br>OMM-GN11,<br>OMM1, OMM1.3,<br>OMM2.5, UPMD1,<br>and 92.1) and UM<br>PDXs | AA, ATM, PA,<br>and WB | Strong synergy between Sotrastaurin +<br>Binimetinib compared to monotherapies.<br>(Promote apoptosis, inhibit proliferation, and<br>tumor growth) | (Carita et al.,<br>2016; Chen<br>et al., 2014) |
|                                                       |           | UM cell lines (C918,<br>Mel202, Mel270,<br>Mel285, Mel290,<br>MUM-2C, OMM-<br>GN11, OMM1.3,<br>UPMD1, and 92.1)<br>and UM PDXs                                                                       |                        | Strong synergy between Sotrastaurin +<br>Mirdametinib compared to monotherapies.<br>(Promote apoptosis, and inhibit proliferation)                 | (Chen et al.,<br>2014)                         |

|                                           |                              |                                                                                                                                                            |                              |                                                                                                                                                                                                                               |                                                 |
|-------------------------------------------|------------------------------|------------------------------------------------------------------------------------------------------------------------------------------------------------|------------------------------|-------------------------------------------------------------------------------------------------------------------------------------------------------------------------------------------------------------------------------|-------------------------------------------------|
| AHT956                                    | PKC                          | UM cell lines (C918, Mel202, Mel270, Mel285, Mel290, MUM-2C, OMM-GN11, OMM1.3, UPMD1, and 92.1)                                                            | PA, and WB                   | Promotes G1 cell cycle arrest                                                                                                                                                                                                 | (Chen et al., 2014)                             |
| AZD6244<br>(Selumetinib)                  | MEK1/2                       | UM cell lines (C918, M619, Mel202, Mel270, Mel285, Mel290, MUM-2B, MUM-2C, OCM-1, OCM-1A, OCM-3, OMM1.3, and 92.1) and metastatic UM patient tumor tissues | MA, PA, PCR, and WB          | Promotes G1 cell cycle arrest<br>Inhibits migration, and proliferation                                                                                                                                                        | (Ambrosini et al., 2012; Wu, Zhu, et al., 2012) |
| AZD6244<br>(Selumetinib) +<br>AZD8055     | MEK1/2 +<br>mTOR             | UM cell lines (C918, Mel270, Mel290, OCM-1A, OCM-3, and 92.1) and UM PDXs                                                                                  | AA, ATM, BA, IHC, VA, and WB | Synergistic effect between Selumetinib + AZD8055 relative to monotherapies<br>(Inhibit cell viability)<br>Apoptosis and tumor regression was preferentially induced in <i>BRAF</i> mutant UM cell lines and xenografts models | (Ho et al., 2012)                               |
| AZD6244<br>(Selumetinib) +<br>Dacarbazine | MEK1/2 +<br>Alkylating agent |                                                                                                                                                            |                              | Non-significant synergy between Selumetinib + Dacarbazine                                                                                                                                                                     |                                                 |

|                                                        |                      |                                                                                                                      |                            |                                                                                                                     |                                             |
|--------------------------------------------------------|----------------------|----------------------------------------------------------------------------------------------------------------------|----------------------------|---------------------------------------------------------------------------------------------------------------------|---------------------------------------------|
| AZD6244<br>(Selumetinib) +<br>Docetaxel                | MEK1/2 +<br>Taxane   | UM cell lines<br>(MM28, MM66,<br>MP38, MP41,<br>MP46, and MP65)<br>and UM PDXs                                       | ATM, PD, PK,<br>VA, and WB | Slight increase in ORR for Selumetinib +<br>Docetaxel relative to monotherapies                                     | (Decaudin<br>et al., 2018)                  |
| AZD6244<br>(Selumetinib) +<br>AZ6197                   | MEK1/2 +<br>ERK      |                                                                                                                      |                            | Significant increase in ORR for both Selumetinib<br>+ AZ6197 and Selumetinib + AZD2014 relative<br>to monotherapies |                                             |
| AZD6244<br>(Selumetinib) +<br>AZD2014<br>(Vistusertib) | MEK1/2 +<br>mTORC1/2 |                                                                                                                      |                            |                                                                                                                     |                                             |
| AZD6244<br>(Selumetinib) +<br>Enzastaurin              | MEK1/2 +<br>PKC      | UM cell lines (C918,<br>M619, Mel202,<br>Mel285, MUM-2B,<br>MUM-2C, OCM-1,<br>OCM-1A, OCM-3,<br>OMM1.3, and 92.1)    | AA, PA, and<br>WB          | Increase in antiproliferative effects for<br>Selumetinib + Enzastaurin relative to<br>monotherapies                 | (Wu, Zhu,<br>et al., 2012)                  |
| AZD6244<br>(Selumetinib) +<br>GDC0941                  | MEK1/2 +<br>PI3K     | UM cell lines<br>(Mel202, Mel285,<br>Mel290, MM28,<br>MM66, MP38,<br>MP41, MP46,<br>MP65, OMM1,<br>OMM2.5, and 92.1) | AA, PA, and<br>WB          | Synergistic effect between Selumetinib +<br>GDC0941 relative to monotherapies<br>No induction of apoptosis          | (Amirouchene-<br>Angelozzi<br>et al., 2016) |

|                                      |                 |                                                                                                                   |                                      |                                                                                                                                                                                |                             |
|--------------------------------------|-----------------|-------------------------------------------------------------------------------------------------------------------|--------------------------------------|--------------------------------------------------------------------------------------------------------------------------------------------------------------------------------|-----------------------------|
| AZD6244<br>(Selumetinib) +<br>MK2206 | MEK1/2 +<br>AKT | UM cell lines (C918,<br>Mel202, Mel270,<br>Mel290, OCM-1A,<br>OMM1.3, and 92.1)<br>and UM PDXs                    | AA, ATM, VA,<br>and WB               | Synergistic effect between Selumetinib +<br>MK2206 relative to monotherapies<br>(Promote autophagy, and inhibit tumor growth<br><i>in vivo</i> )                               | (Ambrosini<br>et al., 2013) |
| Crizotinib                           | c-MET           | UM cell lines (C918,<br>Mel285, Mel290,<br>OMM1, OMM1.3,<br>and 92.1) and UM<br>PDXs                              | ATM, IHC,<br>LUCA, MA, PA,<br>and WB | Inhibits migration, and proliferation<br>Non-significant tumor growth inhibition in UM<br>xenografts<br>Prevents macrometastasis of UM cells from<br>developing <i>in vivo</i> | (Surriga et al.,<br>2013)   |
| Enzastaurin                          | PKC             | UM cell lines (C918,<br>M619, Mel202,<br>Mel285, MUM-2B,<br>MUM-2C, OCM-1,<br>OCM-1A, OCM-3,<br>OMM1.3, and 92.1) | AA, PA, and<br>WB                    | Promotes apoptosis, and G1 cell cycle arrest<br>Inhibits proliferation                                                                                                         | (Wu, Zhu,<br>et al., 2012)  |
| Enzastaurin +<br>U0126               | PKC +<br>MEK1/2 | UM cell lines (C918,<br>M619, Mel202,<br>Mel285, MUM-2B,<br>MUM-2C, OCM-1,<br>OCM-1A, OCM-3,<br>OMM1.3, and 92.1) | AA, PA, and<br>WB                    | Increase in antiproliferative effects for<br>Enzastaurin + U0126 relative to monotherapies                                                                                     | (Wu, Zhu,<br>et al., 2012)  |

|                                                                      |                  |                                                                                                                     |                                             |                                                                                                                                               |                                                                               |
|----------------------------------------------------------------------|------------------|---------------------------------------------------------------------------------------------------------------------|---------------------------------------------|-----------------------------------------------------------------------------------------------------------------------------------------------|-------------------------------------------------------------------------------|
| FR900359                                                             | GDI<br>ERK1/2    | UM cell lines<br>(HCmel12, Mel202,<br>OCM-1A, OCM-3,<br>OMM1.3, UM002B,<br>and 92.1)                                | AA, BA, IF,<br>LUCA, MA, PA,<br>PCR, and WB | Promotes apoptosis, G1 cell cycle arrest, and<br>melanocytic re-differentiation<br>Inhibits colony formation, migration, and<br>proliferation | (Lapadula<br>et al., 2019;<br>Onken et al.,<br>2018; Schrage<br>et al., 2015) |
| GSK1120212<br>(Trametinib)                                           | MEK1/2           | UM cell lines<br>(Mel202, MM28,<br>MM66, MP38,<br>MP41, MP46,<br>OMM1.3, OMM1.5,<br>UPMD1, and 92.1)<br>and UM PDXs | AA, ATM, IHC,<br>LUCA, PA,<br>PCR, and WB   | Reduced sensitivity of UM cell lines compared<br>to CM cell lines<br>Promotes apoptosis<br>Induces tumor stasis                               | (Ma et al.,<br>2021; Paradis<br>et al., 2021)                                 |
| GSK1120212<br>(Trametinib) +<br>GSK2126458                           | MEK1/2 +<br>PI3K | UM cell lines<br>(Mel202, Mel270,<br>Mel285, Mel290,<br>OMM1, UPMD1,<br>UPMD2, and 92.1)                            | AA, PA, and<br>WB                           | Greater effect between Trametinib +<br>GSK2126458 relative to monotherapies<br>(Promotes apoptosis, and cell cycle arrest)                    | (Khalili et al.,<br>2012)                                                     |
| GSK1120212<br>(Trametinib) +<br>LSX196<br>(IDE196 =<br>Darovasertib) | MEK1/2 +<br>PKC  | UM cell lines<br>(Mel202, MM66,<br>MP41, MP46,<br>OMM1.3, UPMD1,<br>and 92.1)                                       | AA, LUCA, PA,<br>PCR, and WB                | Strong synergy between Trametinib + LSX196                                                                                                    | (Ma et al.,<br>2021)                                                          |
| GSK1120212<br>(Trametinib) +                                         |                  |                                                                                                                     |                                             | Limited synergy between Trametinib + VS-4718<br>Vs                                                                                            |                                                                               |

|                                               |               |                                                                                                   |                                         |                                                                                                                                                                                                                              |                                         |
|-----------------------------------------------|---------------|---------------------------------------------------------------------------------------------------|-----------------------------------------|------------------------------------------------------------------------------------------------------------------------------------------------------------------------------------------------------------------------------|-----------------------------------------|
| VS-4718 (PND-1186)                            | MEK1/2 + FAK  | UM cell lines (Mel202, MM28, MM66, MP38, MP41, MP46, OMM1.3, OMM1.5, UPMD1, and 92.1) and UM PDXs | AA, ATM, IHC, LUCA, PA, PCR, and WB     | Synergistic effect between Trametinib + VS-4718 (Increase apoptosis, inhibit proliferation including cancer initiating cells, and induce tumor regression and cytotoxic effect in UM xenografts and liver metastasis models) | (Ma et al., 2021; Paradis et al., 2021) |
| GSK1120212 (Trametinib) + RAD001 (Everolimus) | MEK1/2 + mTOR | UM cell lines (Mel202, MM28, MM33, MM66, MP38, MP41, MP46, MP65, OMM1, OMM2.5, and 92.1)          | AA, PA, PCR, and WB                     | Moderate synergy between Trametinib + Everolimus<br>No induction of apoptosis (except in 92.1 cell line)                                                                                                                     | (Amirouchene-Angelozzi et al., 2014)    |
| NAV-2729                                      | ARF6          | UM cell lines (Mel202, and 92.1), UM PDXs, and UM patient tumor tissues                           | ATM, IA, IF, LUCA, NEA, PA, PCR, and WB | Inhibits colony formation, proliferation, and tumor growth                                                                                                                                                                   | (Yoo et al., 2016)                      |
| PF562771                                      | FAK           | UM cell lines (Mel270, and OMM1.3)                                                                | IF, LUCA, PCR, VA, and WB               | Inhibits cell viability                                                                                                                                                                                                      | (Feng et al., 2019)                     |

|                                     |                |                                                                                                                                                            |                                               |                                                                                                                                                          |                                                 |
|-------------------------------------|----------------|------------------------------------------------------------------------------------------------------------------------------------------------------------|-----------------------------------------------|----------------------------------------------------------------------------------------------------------------------------------------------------------|-------------------------------------------------|
| RAD001<br>(Everolimus)              | mTOR           | UM cell lines<br>(Mel202, MM28,<br>MM33, MM66,<br>MP38, MP41,<br>MP46, MP65,<br>OMM1, OMM2.5,<br>and 92.1), UM<br>PDXs, and UM<br>patient tumor<br>tissues | AA, ATM, PA,<br>PCR, and WB                   | Inhibits proliferation, and tumor growth                                                                                                                 | (Amirouchene-<br>Angelozzi<br>et al., 2014)     |
| RAD001<br>(Everolimus) +<br>GDC0941 | mTOR +<br>PI3K | UM cell lines<br>(Mel202, Mel285,<br>Mel290, MM28,<br>MM66, MP38,<br>MP41, MP46,<br>MP65, OMM1,<br>OMM2.5, and 92.1)<br>and UM PDXs                        | AA, ATM, PA,<br>and WB                        | Synergistic effect between Everolimus +<br>GDC0941 relative to monotherapies<br>(Increase apoptosis, and enhance anti-tumor<br>activity <i>in vivo</i> ) | (Amirouchene-<br>Angelozzi<br>et al., 2016)     |
| VS-4718 (PND-<br>1186)              | FAK            | UM cell lines<br>(Mel202, Mel270,<br>MM28, MP38,<br>MP41, MP46,<br>OMM1.3, OMM1.5,<br>and 92.1) and UM<br>PDXs                                             | AA, ATM, IF,<br>IHC, LUCA, PA,<br>PCR, and WB | Promotes apoptosis<br>Inhibits colony formation, and proliferation<br>Reduces tumor size                                                                 | (Feng et al.,<br>2019; Paradis<br>et al., 2021) |



|                                                     |               |                                                                   |                           |                                                                    |                        |
|-----------------------------------------------------|---------------|-------------------------------------------------------------------|---------------------------|--------------------------------------------------------------------|------------------------|
| VS-4718 (PND-1186) + LSX196 (IDE196 = Darovasertib) | FAK + PKC     | UM cell lines (Mel202, MM66, MP41, MP46, OMM1.3, UPMD1, and 92.1) | AA, LUCA, PA, PCR, and WB | Limited synergy between VS-4718 + LSX196                           | (Ma et al., 2021)      |
| VS-4718 (PND-1186) + VS-6766                        | FAK + RAF/MEK | UM cell lines (MM28, MP38, MP41, MP46, OMM1.3, OMM1.5, and 92.1)  | PA, LUCA, and WB          | Synergistic antiproliferative effect for VS-4718 + VS-6766         | (Paradis et al., 2021) |
| VS-6063 (Defactinib) + VS-6766                      | FAK + RAF/MEK | UM cell lines (MM28, MP38, MP41, MP46, OMM1.3, OMM1.5, and 92.1)  | PA, LUCA, and WB          | Synergistic antiproliferative effect for VS-6063 + VS-6766         | (Paradis et al., 2021) |
| YM-254890                                           | GDI           | UM cell lines (Mel202, MM66, MP41, MP46, OMM1.3, UPMD1, and 92.1) | AA, LUCA, PA, PCR, and WB | Promotes apoptosis<br>Inhibits colony formation, and proliferation | (Ma et al., 2021)      |

Abbreviations: AA: apoptosis assay; ATM: animal tumor model; BA: binding assay; CM: cutaneous melanoma; GDI: guanine nucleotide dissociation inhibitor; IF: immunofluorescence; IHC: immunohistochemistry; LUCA: luciferase assay; MA: migration assay; NEA: nucleotide exchange assay; NF-κB: nuclear factor of kappa B; ORR: overall response rate; PA: proliferation assay; PCR: polymerase chain reaction; PD: pharmacodynamic assay; PDX: patient derived xenograft; PK: pharmacokinetic assay; VA: viability assay; WB: western blotting.

## References

- Ambrosini, G., Musi, E., Ho, A. L., de Stanchina, E., & Schwartz, G. K. (2013). Inhibition of mutant GNAQ signaling in uveal melanoma induces AMPK-dependent autophagic cell death. *Molecular Cancer Therapeutics*, 12(5), 768-776. <https://doi.org/10.1158/1535-7163.MCT-12-1020>
- Ambrosini, G., Pratilas, C. A., Qin, L.-X., Tadi, M., Surriga, O., Carvajal, R. D., & Schwartz, G. K. (2012). Identification of unique MEK-dependent genes in GNAQ mutant uveal melanoma involved in cell growth, tumor cell invasion, and MEK resistance. *Clinical Cancer Research: An Official Journal of the American Association for Cancer Research*, 18(13), 3552-3561. <https://doi.org/10.1158/1078-0432.CCR-11-3086>
- Amirouchene-Angelozzi, N., Frisch-Dit-Leitz, E., Carita, G., Dahmani, A., Raymondie, C., Liot, G., Gentien, D., Némati, F., Decaudin, D., Roman-Roman, S., & Schoumacher, M. (2016). The mTOR inhibitor Everolimus synergizes with the PI3K inhibitor GDC0941 to enhance anti-tumor efficacy in uveal melanoma. *Oncotarget*, 7(17), 23633-23646. <https://doi.org/10.18632/oncotarget.8054>
- Amirouchene-Angelozzi, N., Nemati, F., Gentien, D., Nicolas, A., Dumont, A., Carita, G., Camonis, J., Desjardins, L., Cassoux, N., Piperno-Neumann, S., Mariani, P., Sastre, X., Decaudin, D., & Roman-Roman, S. (2014). Establishment of novel cell lines recapitulating the genetic landscape of uveal melanoma and preclinical validation of mTOR as a therapeutic target. *Molecular Oncology*, 8(8), 1508-1520. <https://doi.org/10.1016/j.molonc.2014.06.004>
- Carita, G., Frisch-Dit-Leitz, E., Dahmani, A., Raymondie, C., Cassoux, N., Piperno-Neumann, S., Némati, F., Laurent, C., De Koning, L., Halilovic, E., Jeay, S., Wylie, A., Emery, C., Roman-Roman, S., Schoumacher, M., & Decaudin, D. (2016). Dual inhibition of protein kinase C and p53-MDM2 or PKC and mTORC1 are novel efficient therapeutic approaches for uveal melanoma. *Oncotarget*, 7(23), 33542-33556. <https://doi.org/10.18632/oncotarget.9552>
- Chen, X., Wu, Q., Tan, L., Porter, D., Jager, M. J., Emery, C., & Bastian, B. C. (2014). Combined PKC and MEK inhibition in uveal melanoma with GNAQ and GNA11 mutations. *Oncogene*, 33(39), 4724-4734. <https://doi.org/10.1038/onc.2013.418>
- Decaudin, D., El Botty, R., Diallo, B., Massonnet, G., Fleury, J., Naguez, A., Raymondie, C., Davies, E., Smith, A., Wilson, J., Howes, C., Smith, P. D., Cassoux, N., Piperno-Neumann, S., Roman-Roman, S., & Némati, F. (2018). Selumetinib-based therapy in uveal melanoma patient-derived xenografts. *Oncotarget*, 9(31), 21674-21686. <https://doi.org/10.18632/oncotarget.24670>
- Feng, X., Arang, N., Rigracciolo, D. C., Lee, J. S., Yeerna, H., Wang, Z., Lubrano, S., Kishore, A., Pachter, J. A., König, G. M., Maggiolini, M., Kostenis, E., Schlaepfer, D. D., Tamayo, P., Chen, Q., Rupp, E., & Gutkind, J. S. (2019). A Platform of Synthetic Lethal Gene Interaction Networks Reveals that the GNAQ Uveal Melanoma Oncogene Controls the Hippo Pathway through FAK. *Cancer Cell*, 35(3), 457-472.e5. <https://doi.org/10.1016/j.ccell.2019.01.009>
- Ho, A. L., Musi, E., Ambrosini, G., Nair, J. S., Deraje Vasudeva, S., de Stanchina, E., & Schwartz, G. K. (2012). Impact of combined mTOR and MEK inhibition in uveal melanoma is driven by tumor genotype. *PloS One*, 7(7), e40439. <https://doi.org/10.1371/journal.pone.0040439>
- Khalili, J. S., Yu, X., Wang, J., Hayes, B. C., Davies, M. A., Lizée, G., Esmaeli, B., & Woodman, S. E. (2012). Combination small molecule MEK and PI3K inhibition enhances uveal melanoma cell death in a mutant GNAQ- and GNA11-dependent manner. *Clinical Cancer Research: An Official Journal of the American Association for Cancer Research*, 18(16), 4345-4355. <https://doi.org/10.1158/1078-0432.CCR-11-3227>

- Lapadula, D., Farias, E., Randolph, C. E., Purwin, T. J., McGrath, D., Charpentier, T. H., Zhang, L., Wu, S., Terai, M., Sato, T., Tall, G. G., Zhou, N., Wedegaertner, P. B., Aplin, A. E., Aguirre-Ghiso, J., & Benovic, J. L. (2019). Effects of Oncogenic Gαq and Gα11 Inhibition by FR900359 in Uveal Melanoma. *Molecular Cancer Research: MCR*, 17(4), 963-973. <https://doi.org/10.1158/1541-7786.MCR-18-0574>
- Ma, J., Weng, L., Bastian, B. C., & Chen, X. (2021). Functional characterization of uveal melanoma oncogenes. *Oncogene*, 40(4), 806-820. <https://doi.org/10.1038/s41388-020-01569-5>
- Musi, E., Ambrosini, G., de Stanchina, E., & Schwartz, G. K. (2014). The phosphoinositide 3-kinase α selective inhibitor BYL719 enhances the effect of the protein kinase C inhibitor AEB071 in GNAQ/GNA11-mutant uveal melanoma cells. *Molecular Cancer Therapeutics*, 13(5), 1044-1053. <https://doi.org/10.1158/1535-7163.MCT-13-0550>
- Onken, M. D., Makepeace, C. M., Kaltenbronn, K. M., Kanai, S. M., Todd, T. D., Wang, S., Broekelmann, T. J., Rao, P. K., Cooper, J. A., & Blumer, K. J. (2018). Targeting nucleotide exchange to inhibit constitutively active G protein α subunits in cancer cells. *Science Signaling*, 11(546), eaao6852. <https://doi.org/10.1126/scisignal.aao6852>
- Paradis, J. S., Acosta, M., Saddawi-Konefka, R., Kishore, A., Gomes, F., Arang, N., Tiago, M., Coma, S., Lubrano, S., Wu, X., Ford, K., Day, C.-P., Merlino, G., Mali, P., Pachter, J. A., Sato, T., Aplin, A. E., & Gutkind, J. S. (2021). Synthetic Lethal Screens Reveal Cotargeting FAK and MEK as a Multimodal Precision Therapy for GNAQ-Driven Uveal Melanoma. *Clinical Cancer Research: An Official Journal of the American Association for Cancer Research*, 27(11), 3190-3200. <https://doi.org/10.1158/1078-0432.CCR-20-3363>
- Schrage, R., Schmitz, A.-L., Gaffal, E., Annala, S., Kehraus, S., Wenzel, D., Büllesbach, K. M., Bald, T., Inoue, A., Shinjo, Y., Galandrin, S., Shridhar, N., Hesse, M., Grundmann, M., Merten, N., Charpentier, T. H., Martz, M., Butcher, A. J., Slodczyk, T., ... Kostenis, E. (2015). The experimental power of FR900359 to study Gq-regulated biological processes. *Nature Communications*, 6, 10156. <https://doi.org/10.1038/ncomms10156>
- Surriga, O., Rajasekhar, V. K., Ambrosini, G., Dogan, Y., Huang, R., & Schwartz, G. K. (2013). Crizotinib, a c-Met inhibitor, prevents metastasis in a metastatic uveal melanoma model. *Molecular Cancer Therapeutics*, 12(12), 2817-2826. <https://doi.org/10.1158/1535-7163.MCT-13-0499>
- Wu, X., Li, J., Zhu, M., Fletcher, J. A., & Hodi, F. S. (2012). Protein kinase C inhibitor AEB071 targets ocular melanoma harboring GNAQ mutations via effects on the PKC/Erk1/2 and PKC/NF-κB pathways. *Molecular Cancer Therapeutics*, 11(9), 1905-1914. <https://doi.org/10.1158/1535-7163.MCT-12-0121>
- Wu, X., Zhu, M., Fletcher, J. A., Giobbie-Hurder, A., & Hodi, F. S. (2012). The protein kinase C inhibitor enzastaurin exhibits antitumor activity against uveal melanoma. *PloS One*, 7(1), e29622. <https://doi.org/10.1371/journal.pone.0029622>
- Yoo, J. H., Shi, D. S., Grossmann, A. H., Sorensen, L. K., Tong, Z., Mleynek, T. M., Rogers, A., Zhu, W., Richards, J. R., Winter, J. M., Zhu, J., Dunn, C., Bajji, A., Shenderovich, M., Mueller, A. L., Woodman, S. E., Harbour, J. W., Thomas, K. R., Odelberg, S. J., ... Li, D. Y. (2016). ARF6 Is an Actionable Node that Orchestrates Oncogenic GNAQ Signaling in Uveal Melanoma. *Cancer Cell*, 29(6), 889-904. <https://doi.org/10.1016/j.ccell.2016.04.015>
